# Supplementary material for: The Phenotypic Effects of Royal Jelly on Wild-Type D. melanogaster Are Strain-Specific
Source: PLoS One. 2016 Aug 3;11(8):e0159456. doi: 10.1371/journal.pone.0159456 (PMC4972316; doi:10.1371/journal.pone.0159456)
Supplement: S1 Data — (XLSX) [file pone.0159456.s001.xlsx]

## Sheet: Can-S Females
0% RJ length (mm)	10% RJ length (mm)	15% RJ length (mm)	20% RJ length (mm)
2.5	3	3	2.9
2.5	2.5	3	2.75
2	2.5	3	2.75
2.5	2.5	3	2.75
2	2.5	2.9	2.75
2.5	2.5	2.9	2.5
2.5	2.5	2.8	2.5
2.5	2.5	2.7	2.75
2.5	3	2.5	3
2.5	2.5	2.8	2.75
2.5	2.8	2.8	2.5
2.5	2.5	2.5	2.75
2.2	2.5	2.89	2.9
2.5	2.5	2.5	2.5
2.5	3	2.5	2.9
2.5	2.9	2.5	2.9
2.5	2.5	2.8	2.5
2.5	2.5	2.5	2.5
2.5	2.5	2.9	2.5
2.5	2.5	2.8	3
2.7	2.6	2.5	3
2.2	2.5	2.7	3
2.5	2.5	2.8	3
2.1	2.5	2.6	3
2.1	2.5	2.5	3
2.5	2.5	2	3
2.5	2.25	2.8	3
2.5	2.5	2.5	3
3	2.5	2.7	3
2.9	2.6	2.7	3
2.8	2.5	2.8	2.5
2.6	2.6	2.6	3
2.9	2.5	2.6	2.5
3	2	2.6	2.8
3.1	2.5		2.8
2.6	2.5		2.8
2.2	2.5		2.5
2.2	2.5		2.8
2.5	2.8		3
2	2.5		3
2.2	2.5		2.8
2.5	2.5		2.5
2.5	2.8		2.8
2	2.2		2.5
2.5	2.5		2.5
2.5	2.5		2.7
2.5	2.5		2.8
2.5	2.5		2.8
2.2	2.5		2.6
2.5	2.5		2.6
2.5	2		2.9
2.3	2		2.8
2.6	2.8
2.2	2.5
2.3	2
2.5	2.7
2.6	2.5
2.5	2.5
2.2	2.5
2.5	2.7
2.5	2.7
2.5	2.5
2	2.5
	2.5
	2.5

## Sheet: Ore-R Females
0% RJ length (mm)	15% RJ length (mm)	20% RJ length (mm)
2.8	2.5	2.5
2	2.5	2.6
2	2.5	2.4
2.5	2.75	2.2
2.5	2.75	2.8
2.5	2.75	2.5
2.8	2.75	2.7
2.7	2.75	2.3
2.2	2.75	2.3
2.5	2.5	2.6
2.5	2.75	2.3
2.5	2.5	2.6
2.5	2.5	2.4
2.5	2.75	2.3
2.2	2.5	2.8
2.5	2	2.8
2.5	2.5	2.5
2.5	2.5	2.5
2.8	2.5	2.6
2.8	2.2	2.3
2.5	2.2	2.9
2.5	2.8	2.5
2.2	2.8	2.5
2.5	2.5	2.5
2.6		2.5
2.2		2.5
2.4		2.6
2.5		2.7
2.3		2.8
2.6		2.8
2.5		2.8
2.5		2.7
2.7		2.6
2.5		2.6
2.7		2.8
2.6		2.6
2.5		2.3
2.5		2.7
2.5		2.7
2.5		2.5
2.5		2.7
2.3		2.6
2.9		2.6
2.7		2.7
2.8		2.8
2.7		2.5
2.7		2.6
2.6		2.8
2.8		2.9
2.5		2.7
2.8		2.6
2.7		2.5
2.6		2.6
2.8		2.5
2.8		2.5
2.7		2.6
2.7		2.5
2.8		2.7
2.6		2.7
2.7		2.6
2.7		2.5
2.5		2.6
2.5		2.8
2.6		2.7
2.6		2.5
2.7		2.6
2.6		2.6
2.6		2.7
2.6		2.6
2.8		2.8
2.7		2.6
2.6		2.4
2.9
2.5
2.6
2.4
2.7
2.6
2.6
2.5
2.5
2.6
2.6
2.6
2.4
2.7
2.5

## Sheet: Can-S Males
0% RJ length (mm)	10% RJ length (mm)	15% RJ length (mm)	20% RJ length (mm)
2.3	2.3	2.4	2.4
2.2	2.3	2.3	2.3
2.2	2.2	2.3	2.3
2.2	2.2	2.3	2.4
2.2	2.3	2.4	2.3
2.1	2.3	2.4	2.4
2.3	2.4	2.4
2.2	2.4	2.5
2.1	2.5	2.2
2.2	2.2	2.4
2.1	2.4	2.2
2.1	2.4	2.4
2.1	2.3	2.4
2.1	2.5	2.3
2.2	2.3	2.2
2.2	2.4	2.2
2.3	2.3	2.3
2.2	2.5	2.3
2.2	2.4	2.3
2.3	2.4	2.4
2.1	2.4
2.2	2.4
2.1	2.4
2.1	2.4
2.2	2.3
2.2	2.5
2.2	2.5
2.1	2.5
2.2	2.5
	2.4
	2.3
	2.5
	2.4
	2.3
	2.3
	2.3
	2.3
	2.4
	2.4
	2.3
	2.2
	2.3
	2.3
	2.2
	2.4

## Sheet: Ore-R Males
0% RJ length (mm)	20% RJ length (mm)
2.5	2.2
2.4	2.4
2.5	2.3
2.3	2.3
2.5	2.2
2.5	2.3
2.5	2.2
2.4	2.2
2.4	2.3
2.5	2.3
2.5	2.3
2.5	2.4
2.3	2.3
2.3	2.3
2.3	2.4
2.4	2.2
2.5	2.2
2.4	2.4
2.3	2.2
2.4	2.2
2.3	2.2
2.3	2.3
2.4	2.2
2.4	2.3
2.3	2.4
2.3	2.1
2.5	2.2
2.2	2.3
2.3	2.3
2.1	2.2
2.2	2.2
2.2	2.3
2.2	2.3
2.3	2.4
2.3	2.3
2.1	2.4
2.3	2.2
2.2	2.3
2.4	2.3
2.3	2.2
2.3	2.2
2.3
2.3
2.4
